# Supplementary material for: Recovery of ibuprofen from pharmaceutical wastes using ionic liquids
Source: Royal Society of Chemistry journal article supplement (doi:10.1039/c6gc00261g), 2016-01-01
Supplement: c6gc00261g1.pdf [file c6gc00261g1.pdf]

## Electronic Supplementary Information

### Recovery of ibuprofen from pharmaceutical wastes using ionic liquids

Francisca A. e Silva<sup>1</sup>, Magda Caban<sup>2</sup>, Piotr Stepnowski<sup>2</sup>, João A. P. Coutinho, Sónia P. M. Ventura<sup>1\*</sup>

<sup>1</sup>*CICECO – Aveiro Institute of Materials, Department of Chemistry, University of Aveiro, 3810-193 Aveiro, Portugal*

<sup>2</sup>*Department of Environmental Analysis, Institute for Environmental and Human Health Protection, Faculty of Chemistry, University of Gdańsk, ul. Wita Stwosza 63, 80-308 Gdańsk, Poland*

\*Corresponding author:

E-mail: [spventura@ua.pt](mailto:spventura@ua.pt), phone: +351-234-370200, fax: 351-234-370084

Campus Universitário de Santiago, Departamento de Química, Universidade de Aveiro, 3810-193 Aveiro, Portugal

**Table S.1** Detailed extraction efficiency of ibuprofen data acquired during the initial screening aimed at finding the optimal IL.

| IL                     | 100 % mass fraction composition (wt%) |                     |                  | EE <sub>IBU</sub> ± $\sigma$ / (%) |
|------------------------|---------------------------------------|---------------------|------------------|------------------------------------|
|                        | IL                                    | Citrate buffer salt | H <sub>2</sub> O |                                    |
| [BzCh]Cl               | 45                                    | 0                   | 55               | 11.58 ± 0.63                       |
|                        | 45                                    | 5                   | 50               | 93.73 ± 1.62                       |
| [C <sub>4</sub> mim]Cl | 45                                    | 0                   | 55               | 17.94 ± 1.20                       |
|                        | 45                                    | 5                   | 50               | 90.41 ± 0.50                       |
| [N <sub>4444</sub> ]Cl | 45                                    | 0                   | 55               | 93.53 ± 0.62                       |
|                        | 45                                    | 5                   | 50               | 97.92 ± 2.65                       |

**Table S.2** Detailed extraction efficiency of ibuprofen data acquired during the optimization studies aimed at gauging the balance between the  $[N_{4444}]Cl$  and citrate buffer salt concentrations.

| 100 % mass fraction composition (wt%) |                     |        | $EE_{IBU} \pm \sigma / (\%)$ |
|---------------------------------------|---------------------|--------|------------------------------|
| $[N_{4444}]Cl$                        | Citrate buffer salt | $H_2O$ |                              |
| 0                                     | 0                   | 100    | $1.69 \pm 0.03$              |
| 15                                    | 0                   | 85     | $2.40 \pm 0.02$              |
| 25                                    | 0                   | 75     | $7.20 \pm 0.19$              |
| 35                                    | 0                   | 65     | $61.12 \pm 0.57$             |
| 45                                    | 0                   | 55     | $93.53 \pm 0.62$             |
| 50                                    | 0                   | 50     | $91.78 \pm 3.82$             |
| 55                                    | 0                   | 45     | $98.49 \pm 0.40$             |
| 0                                     | 5                   | 95     | $16.59 \pm 0.57$             |
| 0                                     | 15                  | 85     | $4.70 \pm 0.29$              |
| 0                                     | 25                  | 75     | $2.51 \pm 0.04$              |
| 0                                     | 35                  | 65     | $0.69 \pm 0.11$              |
| 15                                    | 5                   | 80     | $13.66 \pm 0.80$             |
| 25                                    | 5                   | 70     | $47.55 \pm 0.76$             |
| 35                                    | 5                   | 60     | $88.80 \pm 0.45$             |
| 45                                    | 5                   | 50     | $97.92 \pm 2.65$             |
| 25                                    | 10                  | 65     | $79.52 \pm 1.60$             |
| 10                                    | 25                  | 65     | $12.95 \pm 0.76$             |
| 15                                    | 15                  | 70     | $19.34 \pm 1.01$             |
| 5                                     | 15                  | 80     | $3.53 \pm 0.10$              |

**Table S.3** Experimental data of recovery efficiency of ibuprofen acquired during the ibuprofen recovery step through precipitation with an anti-solvent.

| extract : anti-solvent                              | RE <sub>IBU</sub> ± σ /(%)                                                     |                                                         |
|-----------------------------------------------------|--------------------------------------------------------------------------------|---------------------------------------------------------|
|                                                     | 45 wt% [N <sub>4444</sub> ]Cl + 5 wt% citrate buffer + 50 wt% H <sub>2</sub> O | 45 wt% [N <sub>4444</sub> ]Cl + 55 wt% H <sub>2</sub> O |
| <i>Anti-solvent: 25 wt% of KCl aqueous solution</i> |                                                                                |                                                         |
| 1:1                                                 | 13.53 ± 0.86                                                                   | 60.94 ± 2.41                                            |
| 1:2                                                 | 58.40 ± 2.57                                                                   | 85.79 ± 0.29                                            |
| 1:3                                                 | 75.08 ± 0.53                                                                   | 94.04 ± 0.49                                            |
| 1:4                                                 | 84.53 ± 1.26                                                                   | 96.00 ± 0.15                                            |
| 1:5                                                 | 87.97 ± 1.00                                                                   | 97.07 ± 0.14                                            |
| <i>Anti-solvent: H<sub>2</sub>O</i>                 |                                                                                |                                                         |
| 1:1                                                 | 22.37 ± 2.46                                                                   | 86.11 ± 0.72                                            |
| 1:2                                                 | 33.71 ± 2.32                                                                   | 90.45 ± 0.13                                            |
| 1:3                                                 | 34.71 ± 4.00                                                                   | 91.60 ± 0.19                                            |
| 1:4                                                 | 28.31 ± 0.45                                                                   | 89.17 ± 0.30                                            |
| 1:5                                                 | 26.72 ± 5.45                                                                   | 88.09 ± 0.17                                            |

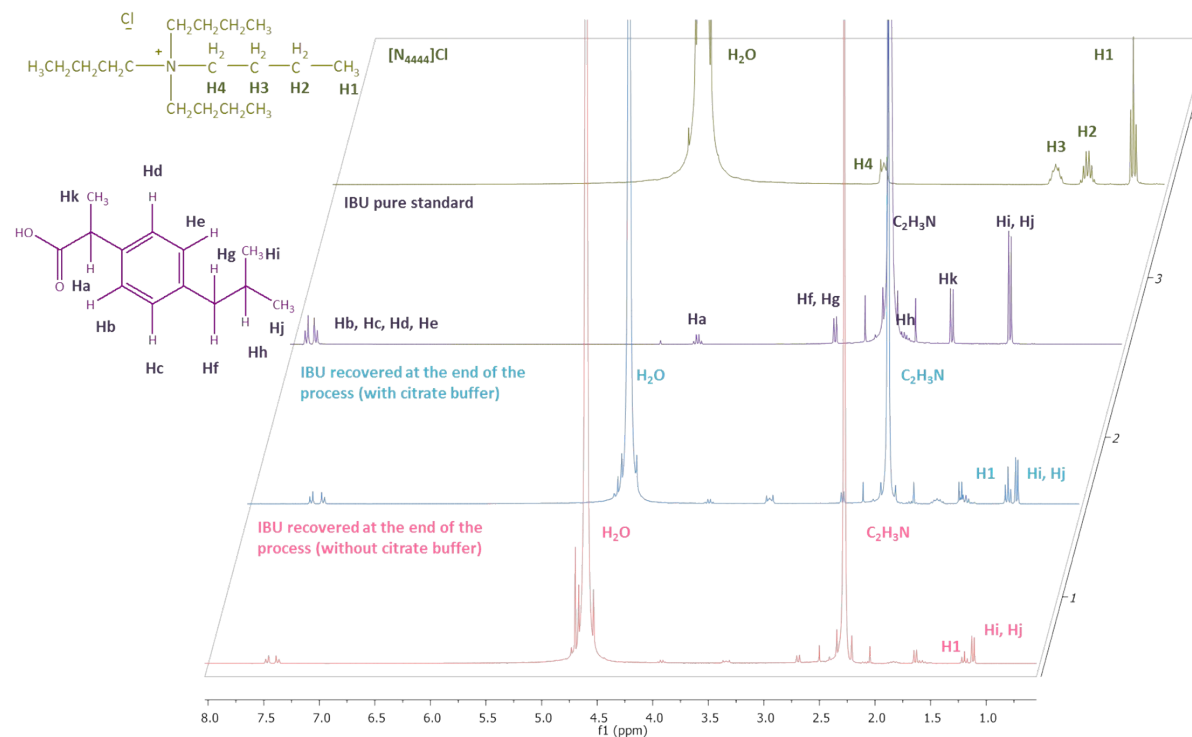

**Fig. S.1**  $^1\text{H}$  NMR spectra for ibuprofen recovered from the 45 wt%  $[N_{4444}]\text{Cl}$  aqueous solution after the addition of water in a ratio of 1:3 in a 50:50  $\text{H}_2\text{O}:\text{C}_2\text{H}_3\text{N}$  mixture (1), 45 wt%  $[N_{4444}]\text{Cl}$  + 5 wt% citrate buffer aqueous solution after the addition of KCl aqueous solution in a ratio of 1:4 in a 50:50  $\text{H}_2\text{O}:\text{C}_2\text{H}_3\text{N}$  mixture (2), ibuprofen pure standard from Sigma in  $\text{C}_2\text{H}_3\text{N}$  (3) and  $[N_{4444}]\text{Cl}$  in  $\text{H}_2\text{O}$  (4). A Bruker Avance 300 spectrometer operating at 300.13 MHz was used for this purpose, utilizing appropriate tubes containing closed reference capillaries with  $\text{D}_2\text{O}$  and TSP as the internal reference. Ibuprofen and  $[N_{4444}]\text{Cl}$  atom labelling are also provided.

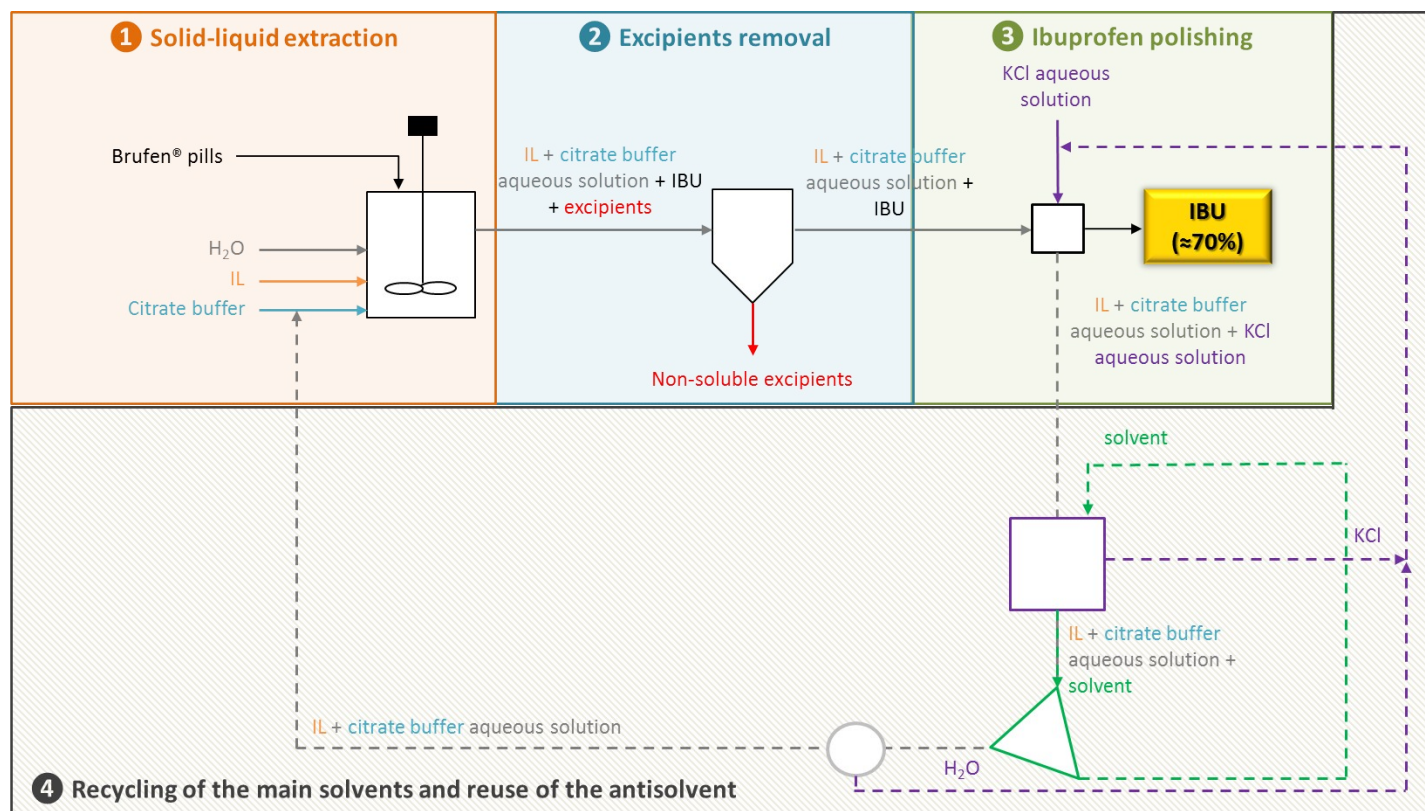

**Fig. S.2** Schematic representation of the integrated process of extraction, purification, ibuprofen recovery and recycling of the main solvents based on the use of [N<sub>4444</sub>]Cl + citrate buffer aqueous solution and KCl as the solvent and anti-solvent, respectively. The purple square represents the removal of KCl in solution, the green square consists on the separation of the solvent used in the KCl removal and the grey circle is the evaporation of the extra amount of water added together with KCl as anti-solvent.
